# Supplementary material
Source: PubMed Central journal article supplement (PMC4561713)
Supplement: AEM.01716-15_zam999116617so1.pdf [file AEM.01716-15_zam999116617so1.pdf]

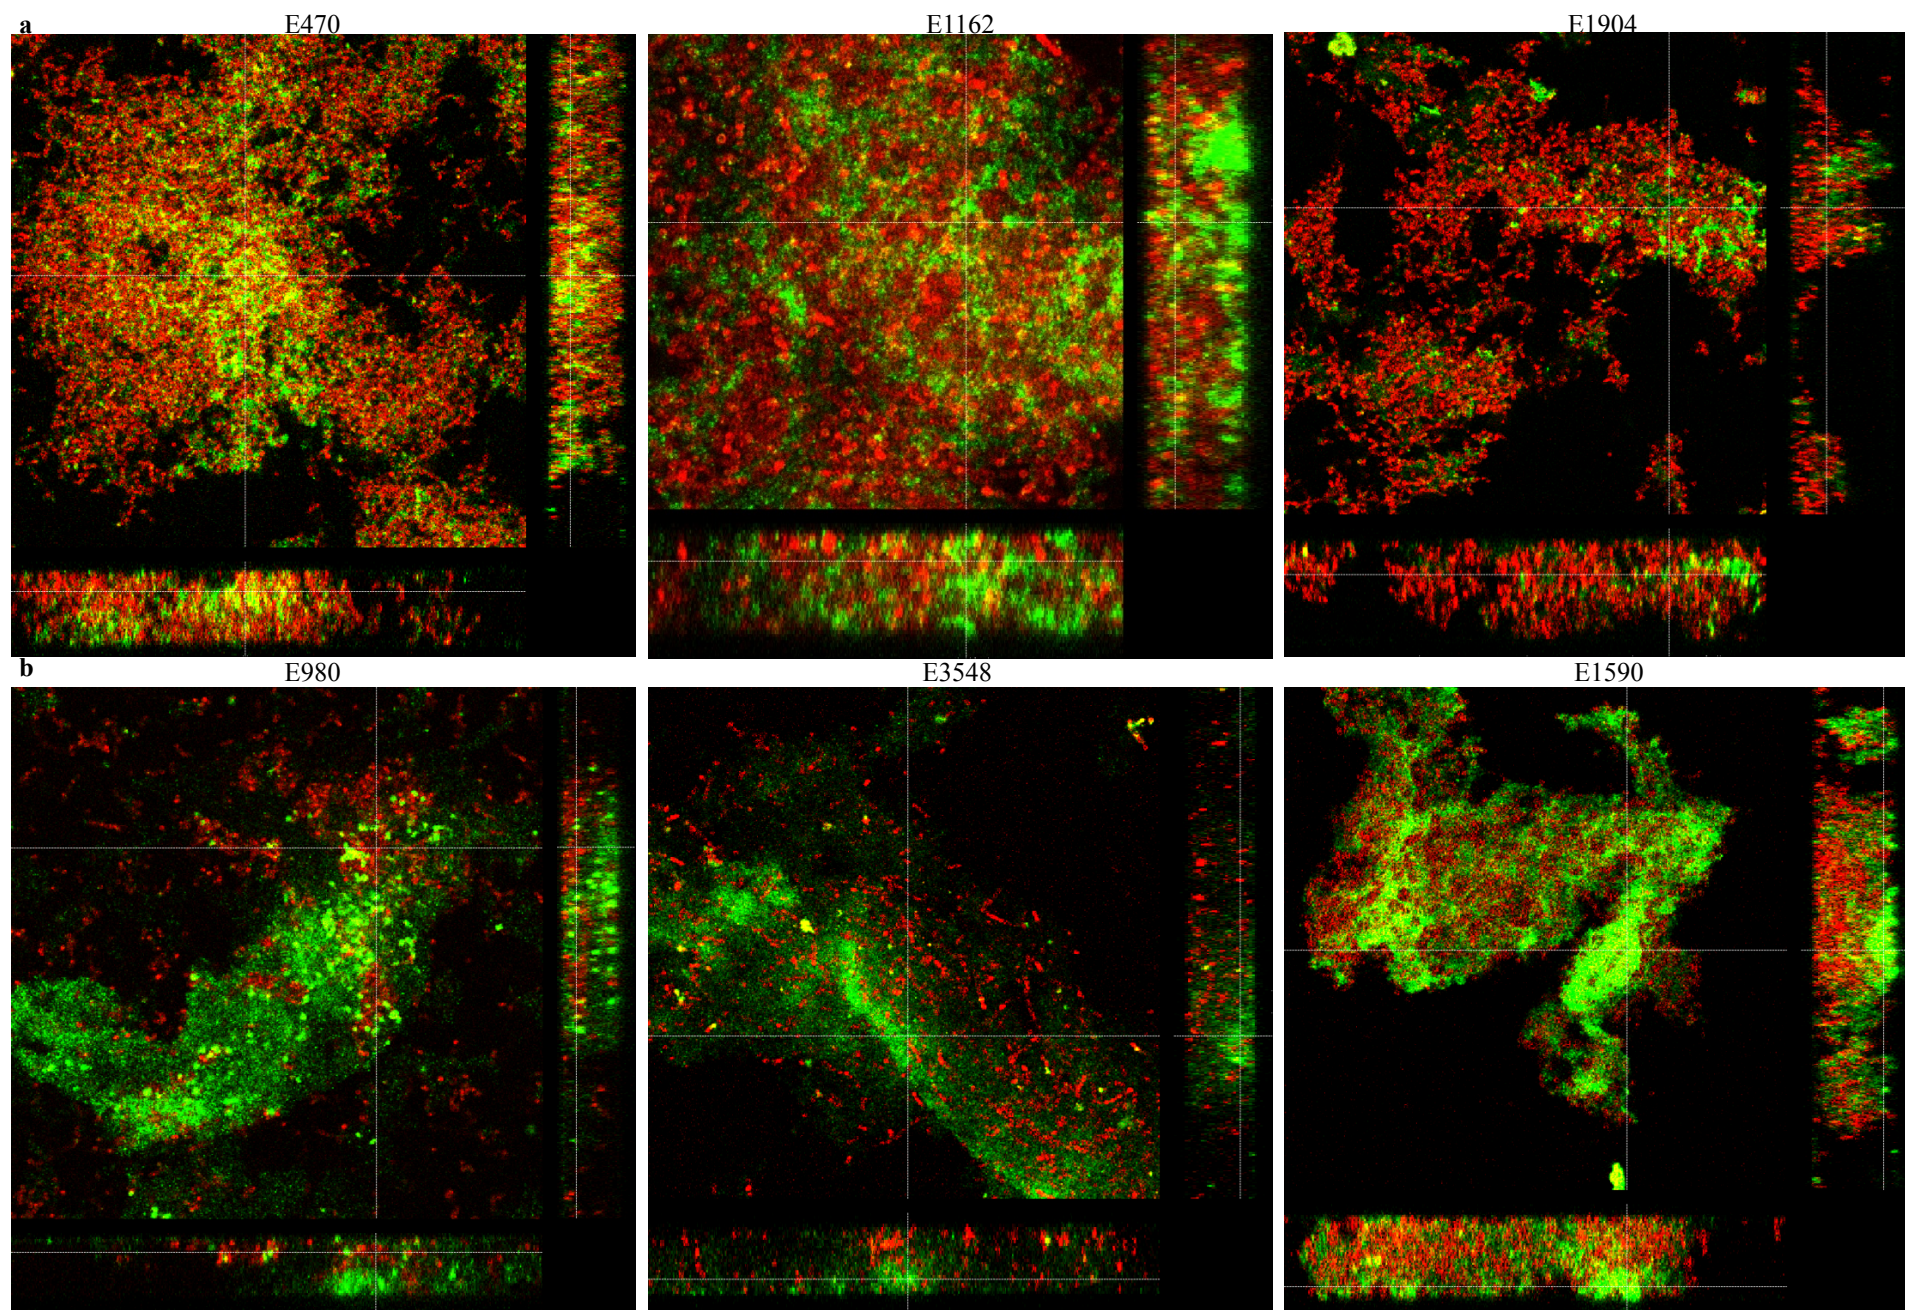

**Figure S1. Confocal microscopy orthoview images depicting biofilm thickness and SagA localization in a semi-static biofilm model.** Biofilms of three clade A1 (a) and three clade B strains (b), were grown for 24 h on poly-L-Lysine coated glass, in TSBg, at 120 rpm, at 37°C. Biofilms were incubated with  $\alpha$ -SagA and goat  $\alpha$ -rabbit Alexa 488 (green). Bacterial membranes were stained with FM 95-5 (red). Pictures were taken at 63x magnification with 2.0 optical zoom.

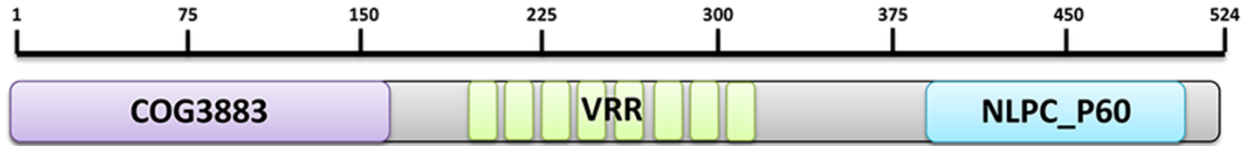

**Figure S2. Prediction of structural domains of SagA protein sequence.** COG3883 is an uncharacterized conserved domain identified in bacteria. NLPC\_P60 is a conserved domain found in several lipoproteins involved in cell wall biogenesis. The central part of the protein, indicated with green bars, represents the variable repeat region (VRR) with differences between *E. faecium* strains belonging to clade A1 and B and the polyphyletic Intermediate Group (IG).

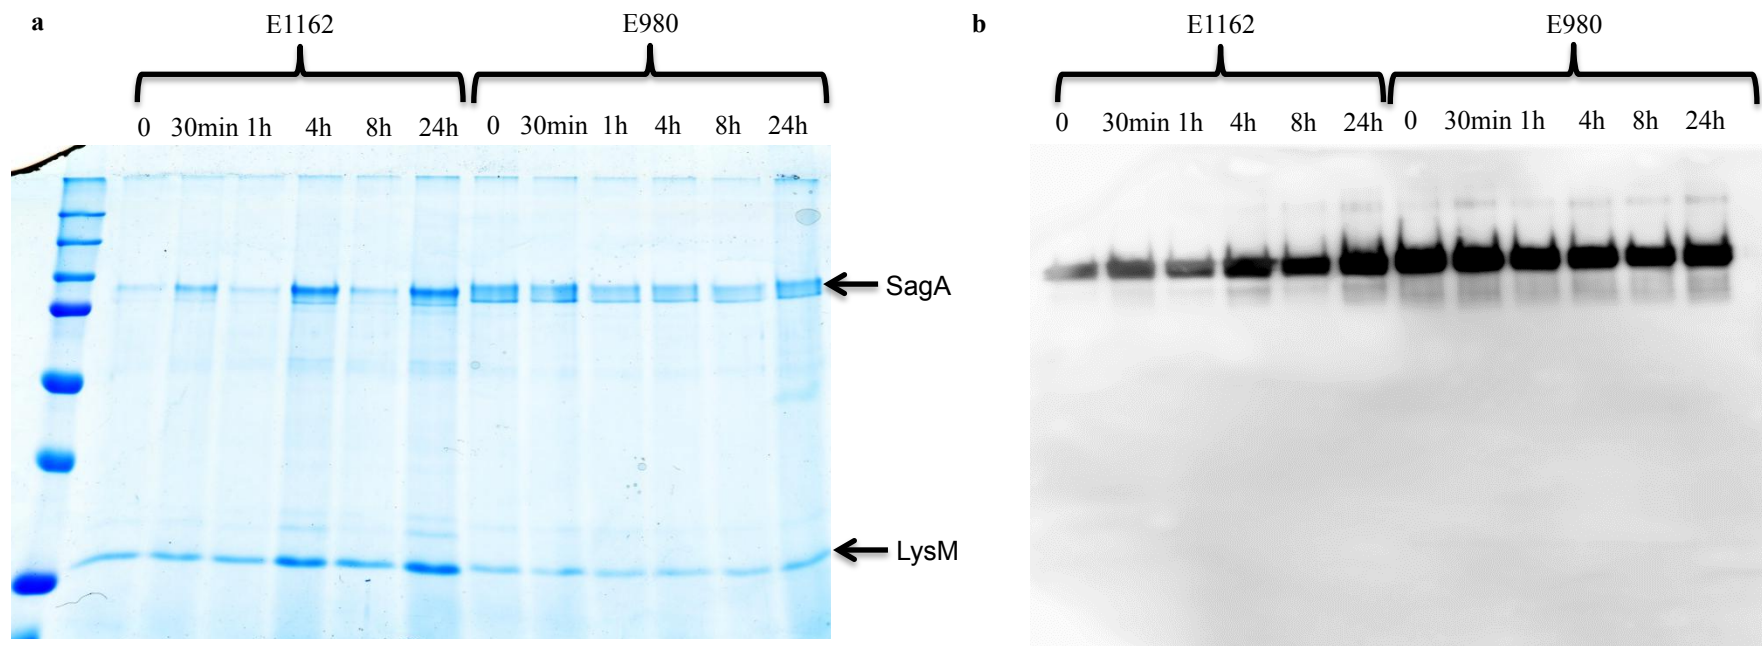

**Figure S3. Stability of proteins released in the biofilm supernatant.** a. Proteins present in the 24 h biofilm supernatant of hospital-associated (clade A1) *E. faecium* strain E1162 and community (clade B) *E. faecium* strain E980 were equally loaded and separated using a 12.5% SDS page gel and stained with Coomassie blue after incubation at 37°C for 30 min, 1 h, 4 h, 8 h and 24 h. b. Presence of SagA in the biofilm supernatant of *E. faecium* strains after incubation at 37°C, analyzed by Western Blot using rabbit  $\alpha$ -SagA immune sera.

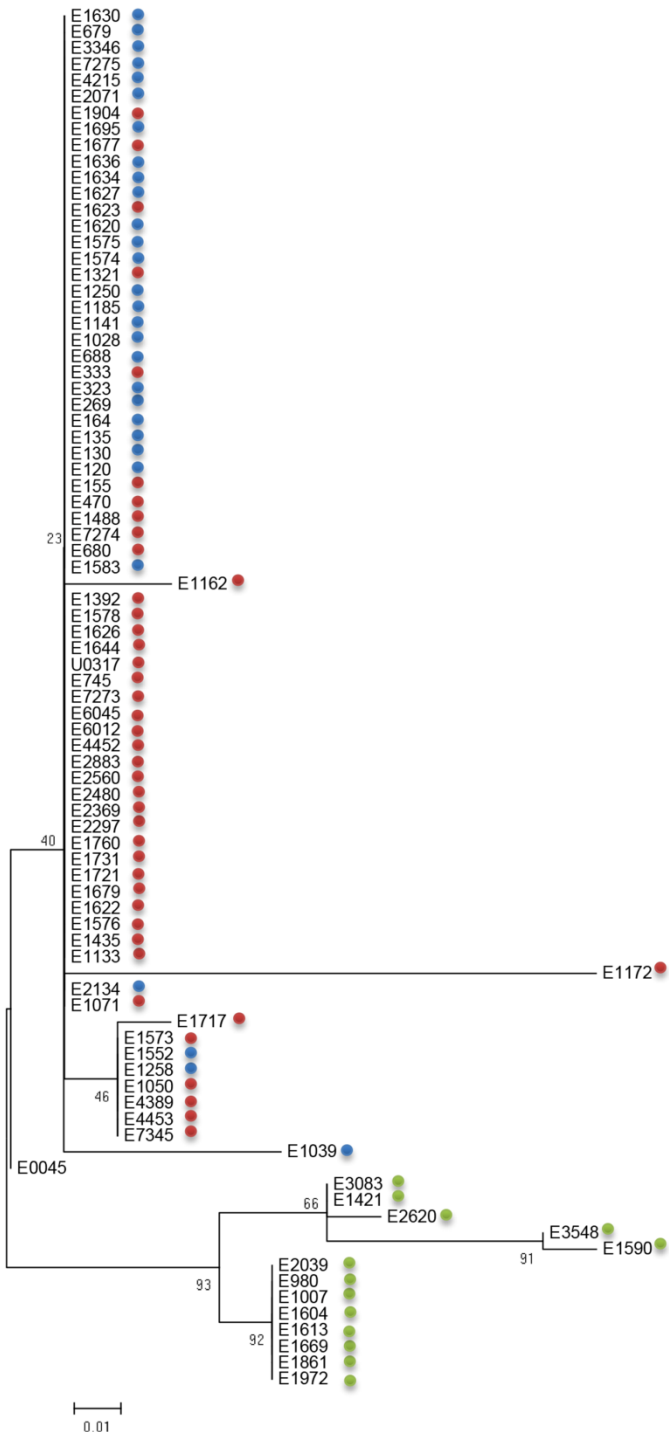

**Figure S4. Phylogenetic tree based on the variable repeat region of SagA.** SagA sequences from 85 *E. faecium* strains were used to build the phylogenetic tree, based on amino acid level of selected variable repeat region by MUSCLE and Mega version 6. Numbers near branches indicate bootstrap values in percentage. Colored circles indicate the clade origin of strains according to core genome-based phylogeny. Clade A1 is indicated in red, IG is indicated in blue, and clade B is indicated in green.

## Supporting data

**Table S1.** Ecological origin and clade assignment of 85 *E. faecium* strains.

| Strains | Other name | Clade | ST  | Country | Year | Epidemiology      | Isolation site | Reference  |
|---------|------------|-------|-----|---------|------|-------------------|----------------|------------|
| E0045   | EnGen0005  | IG    | 9   | GBR     | 1992 | Poultry           | Faeces         | (1)        |
| E120    | EnGen0012  | IG    | 27  | NLD     | 1995 | Clinical isolate  | Ascites        | (1)        |
| E130    | E0130      | IG    | 6   | NLD     | 1996 | Community         | Faeces         | This study |
| E135    | E0135      | IG    | 6   | NLD     | 1996 | Community         | Faeces         | This study |
| E155    | E0155      | A1    | 17  | USA     | 1995 | Hospital outbreak | Faeces         | (2)        |
| E164    | EnGen0010  | IG    | 26  | NLD     | 1996 | Poultry           | Faeces         | (1)        |
| E269    | EnGen0022  | IG    | 9   | NLD     | 1996 | Poultry           | Faeces         | (1)        |
| E323    | E0323      | IG    | 79  | FRA     | 1997 | Clinical isolate  | Faeces         | This study |
| E333    | EnGen0013  | IG    | 80  | ISR     | 1997 | Clinical isolate  | Blood          | (1)        |
| E470    | E0470      | IG    | 16  | NLD     | 1999 | Hospital outbreak | nd             | This study |
| E679    | EnGen0014  | IG    | 150 | BEL     | 1995 | Pig               | nd             | (1)        |
| E680    | EnGen0019  | IG    | 151 | DEU     | 1995 | Pig               | nd             | (1)        |
| E688    | EnGen0008  | IG    | 5   | ESP     | 1995 | Pig               | nd             | (1)        |
| E980    | E0980      | B     | 94  | NLD     | 1998 | Community         | Faeces         | (3)        |
| E1007   | EnGen0015  | B     | 61  | NLD     | 1998 | Community         | Faeces         | (1)        |
| E1028   | E1028      | IG    | 56  | NLD     | 1998 | Community         | Faeces         | This study |

---

|       |           |    |     |     |      |                   |          |            |
|-------|-----------|----|-----|-----|------|-------------------|----------|------------|
| E1039 | E1039     | IG | 42  | NLD | 1998 | Community         | Faeces   | (3)        |
| E1050 | EnGen0017 | A1 | 92  | NLD | 1998 | Community         | Faeces   | (1)        |
| E1071 | E1071     | A1 | 32  | NLD | 2000 | Clinical isolate  | Faeces   | (3)        |
| E1133 | EnGen0002 | A1 | 117 | USA | 2001 | Clinical isolate  | Faeces   | (1)        |
| E1141 | E1141     | IG | 123 | NLD | 1995 | Clinical isolate  | nd       | This study |
| E1162 | E1162     | A1 | 17  | FRA | 1997 | Clinical isolate  | Blood    | (3)        |
| E1172 | E1172     | A1 | 99  | POL | 1998 | Clinical isolate  | Urine    | This study |
| E1185 | EnGen0011 | IG | 26  | FRA | 1998 | Clinical isolate  | Blood    | (1)        |
| E1250 | E1250     | IG | 25  | CHE | 1997 | Clinical isolate  | Blood    | This study |
| E1258 | EnGen0004 | IG | 127 | ESP | 1998 | Clinical isolate  | Blood    | (1)        |
| E1321 | EnGen0054 | A1 | 78  | ITA | 1999 | Clinical isolate  | Catheter | (1)        |
| E1392 | EnGen0016 | A1 | 64  | GBR | 2000 | Clinical isolate  | nd       | (1)        |
| E1421 | E1421     | B  | 100 | GBR | 2000 | Clinical isolate  | nd       | This study |
| E1435 | E1435     | A1 | 65  | GRC | 1999 | Hospital outbreak | nd       | This study |
| E1488 | E1488     | A1 | 32  | ESP | 2000 | Community         | Faeces   | This study |
| E1552 | EnGen0021 | IG | 5   | NLD | 2002 | Clinical isolate  | Faeces   | (1)        |
| E1573 | EnGen0009 | A1 | 21  | BEL | 1994 | Bison             | Rumen    | (1)        |
| E1574 | EnGen0020 | IG | 27  | BEL | 1995 | Dog               | nd       | (1)        |
| E1575 | EnGen0001 | IG | 158 | BEL | 1995 | Poultry           | nd       | (1)        |

---

---

|       |           |    |     |     |      |                   |          |            |
|-------|-----------|----|-----|-----|------|-------------------|----------|------------|
| E1576 | EnGen0018 | A1 | 159 | ZAF | 2001 | Ostrich           | Ceacum   | (1)        |
| E1578 | EnGen0007 | A1 | 160 | DEU | 2001 | Pig               | Faeces   | (1)        |
| E1583 | E1583     | IG | 161 | BEL | 2001 | Community         | Faeces   | This study |
| E1590 | EnGen0003 | B  | 163 | IRL | 2001 | Community         | Faeces   | (1)        |
| E1604 | EnGen0028 | B  | 75  | NOR | 1956 | Cheese            | Food     | (1)        |
| E1613 | EnGen0029 | B  | 77  | NOR | 1964 | Fish burger       | Food     | (1)        |
| E1620 | EnGen0027 | IG | 67  | NLD | 1957 | Clinical isolate  | Blood    | (1)        |
| E1622 | EnGen0032 | A1 | 104 | NLD | 1959 | Rodent            | nd       | (1)        |
| E1623 | EnGen0031 | A1 | 22  | NLD | 1960 | Clinical isolate  | Pus      | (1)        |
| E1626 | EnGen0025 | A1 | 92  | NLD | 1965 | Clinical isolate  | Stomach  | (1)        |
| E1627 | EnGen0035 | IG | 66  | NLD | 1979 | Clinical isolate  | Gut      | (1)        |
| E1630 | EnGen0039 | IG | 69  | NLD | 1981 | Environment       | Water    | (1)        |
| E1634 | EnGen0040 | IG | 66  | NLD | 1982 | Environment       | Water    | (1)        |
| E1636 | E1636     | IG | 106 | NLD | 1961 | Clinical isolate  | Blood    | (3)        |
| E1644 | EnGen0051 | A1 | 78  | DEU | 2002 | Hospital outbreak | nd       | (1)        |
| E1669 | E1669     | B  | 94  | BRA | nd   | Clinical isolate  | nd       | This study |
| E1677 | E1677     | A1 | 113 | BRA | nd   | Clinical isolate  | nd       | This study |
| E1679 | E1679     | A1 | 114 | BRA | 1998 | Hospital outbreak | Catheter | (3)        |
| E1695 | E1695     | IG | 97  | BRA | 1998 | Clinical isolate  | Faeces   | This study |

---

---

|       |           |    |     |     |      |                   |          |            |
|-------|-----------|----|-----|-----|------|-------------------|----------|------------|
| E1717 | E1717     | A1 | 18  | DNK | nd   | Hospital outbreak | nd       | This study |
| E1721 | E1721     | A1 | 169 | TZA | nd   | Clinical isolate  | Blood    | This study |
| E1731 | EnGen0036 | A1 | 18  | TZA | 2002 | Clinical isolate  | Blood    | (1)        |
| E1760 | E1760     | A1 | 173 | AUS | 2000 | Hospital outbreak | nd       | This study |
| E1861 | EnGen0042 | B  | 289 | ESP | 2001 | Clinical isolate  | Faeces   | (1)        |
| E1904 | EnGen0024 | A1 | 210 | NLD | 2001 | Clinical isolate  | Urine    | (1)        |
| E1972 | EnGen0033 | B  | 299 | DEU | 2000 | Clinical isolate  | Blood    | (1)        |
| E2039 | EnGen0026 | B  | 296 | DEU | 2000 | Clinical isolate  | K-Spitze | (1)        |
| E2071 | EnGen0044 | IG | 27  | DNK | 2001 | Poultry           | nd       | (1)        |
| E2134 | EnGen0043 | IG | 12  | NLD | 2004 | Poultry           | nd       | (1)        |
| E2297 | EnGen0034 | A1 | 117 | USA | 2001 | Clinical isolate  | Urine    | (1)        |
| E2369 | EnGen0050 | A1 | 78  | HUN | 2005 | Clinical isolate  | Wound    | (1)        |
| E2480 | C68       | A1 | 16  | USA | 1996 | Hospital outbreak | nd       | (1)        |
| E2560 | EnGen0046 | A1 | 78  | NLD | 2006 | Clinical isolate  | Blood    | (1)        |
| E2620 | EnGen0038 | B  | 331 | NLD | 2006 | Clinical isolate  | Blood    | (1)        |
| E2883 | EnGen0030 | A1 | 325 | NLD | 2002 | Clinical isolate  | Blood    | (1)        |
| E3083 | EnGen0056 | B  | 327 | NLD | 2000 | Clinical isolate  | Blood    | (1)        |
| E3346 | EnGen0052 | IG | 332 | NLD | 2002 | Clinical isolate  | Blood    | (1)        |
| E3548 | EnGen0047 | B  | 328 | NLD | 2004 | Clinical isolate  | Blood    | (1)        |

---



---

|       |           |    |     |     |      |                   |        |             |
|-------|-----------|----|-----|-----|------|-------------------|--------|-------------|
| E4215 | EnGen0048 | IG | 310 | SWE | 2004 | Poultry           | nd     | (1)         |
| E4389 | EnGen0057 | A1 | 78  | DNK | 2008 | Dog               | Faeces | (1)         |
| E4452 | E4452     | A1 | 266 | NLD | 2008 | Dog               | Faeces | (4)         |
| E4453 | E4453     | A1 | 192 | NLD | 2008 | Dog               | Faeces | (4)         |
| E6012 | EnGen0045 | A1 | 78  | LVA | 2010 | Clinical isolate  | Rectum | (1)         |
| E6045 | EnGen0049 | A1 | 78  | PRT | 2010 | Clinical isolate  | Rectum | (1)         |
| E7273 | E7273     | A1 | 117 | ESP | 2009 | Clinical isolate  | Faeces | This study  |
| E7274 | E7274     | A1 | 203 | ESP | 2006 | Clinical isolate  | Blood  | This study  |
| E7275 | E7275     | IG | nd  | ESP | 2009 | Clinical isolate  | Faeces | This study  |
| E7345 | AUS0004   | A1 | 17  | AUS | 1998 | Clinical isolate  | blood  | (5)         |
| E745  | E745      | A1 | 16  | NLD | 2000 | Hospital outbreak | Faeces | unpublished |
| U0317 | U0317     | A1 | 78  | NLD | 2005 | Clinical isolate  | Urine  | (3)         |

---

## Reference list

1. **Lebreton F, van Schaik W, McGuire AM, Godfrey P, Griggs A, Mazumdar V, Corander J, Cheng L, Saif S, Young S, Zeng Q, Wortman J, Birren B, Willems RJ, Earl AM, Gilmore MS.** 2013. Emergence of epidemic multidrug-resistant *Enterococcus faecium* from animal and commensal strains. *MBio* **4**:e00534-00513.
2. **de Been M, van Schaik W, Cheng L, Corander J, Willems RJ.** 2013. Recent recombination events in the core genome are associated with adaptive evolution in *Enterococcus faecium*. *Genome Biol Evol* **5**:1524-1535.
3. **van Schaik W, Top J, Riley DR, Boekhorst J, Vrijenhoek JE, Schapendonk CM, Hendrickx AP, Nijman IJ, Bonten MJ, Tettelin H, Willems RJ.** 2010. Pyrosequencing-based comparative genome analysis of the nosocomial pathogen *Enterococcus faecium* and identification of a large transferable pathogenicity island. *BMC Genomics* **11**:239.
4. **de Regt MJ, van Schaik W, van Luit-Asbroek M, Dekker HA, van Duijkeren E, Koning CJ, Bonten MJ, Willems RJ.** 2012. Hospital and community ampicillin-resistant *Enterococcus faecium* are evolutionarily closely linked but have diversified through niche adaptation. *PLoS One* **7**:e30319.
5. **Lam MM, Seemann T, Bulach DM, Gladman SL, Chen H, Haring V, Moore RJ, Ballard S, Grayson ML, Johnson PD, Howden BP, Stinear TP.** 2012. Comparative analysis of the first complete *Enterococcus faecium* genome. *J Bacteriol* **194**:2334-2341.



**Table S3. Proteomics analysis of biofilm supernatant.** Mass spectrometry of the excised protein bands from 24 h biofilm supernatant. Mass spectrometry was performed by matrix-assisted laser desorption/ionization-time of flight (MALDI-TOF) mass spectrometry, using an Ultraflex MALDI-TOF/TOF mass spectrometer (Bruker Daltonics).

| Band  | Accession    | Locus          | Mass  | Score | Description                                                                                                              |
|-------|--------------|----------------|-------|-------|--------------------------------------------------------------------------------------------------------------------------|
| 75kDa | gi:424797365 | ZP_18222963.1  | 51731 | 125   | NlpC/P60 family protein<br>[ <i>Enterococcus faecium</i> S447]                                                           |
|       | gi:314938222 | ZP_07845522.1  | 52950 | 123   | NlpC/P60 family protein<br>[ <i>Enterococcus faecium</i> TX0133a04]                                                      |
|       | gi:314992106 | ZP_07857556.1  | 52922 | 123   | NlpC/P60 family protein<br>[ <i>Enterococcus faecium</i> TX0133B]                                                        |
|       | gi:424790089 | ZP_18216682.1  | 52977 | 123   | NlpC/P60 family protein<br>[ <i>Enterococcus faecium</i> V689]                                                           |
|       | gi:431747447 | ZP_19536241.1  | 53108 | 123   | protein P54 [ <i>Enterococcus faecium</i><br>E2134]                                                                      |
|       | gi:289565032 | ZP_06445486.1  | 53894 | 122   | secreted antigen SagA<br>[ <i>Enterococcus faecium</i> D344SRF]                                                          |
|       | gi:294623697 | ZP_06702530.1  | 54140 | 122   | SagA [ <i>Enterococcus faecium</i><br>U0317]                                                                             |
|       | gi:383329927 | YP_005355811.1 | 54411 | 122   | NlpC/P60 family lipoprotein<br>[ <i>Enterococcus faecium</i> Aus0004]                                                    |
| 50kDa | gi:69246939  | ZP_00604194.1  | 80399 | 74    | Sulfatase [ <i>Enterococcus faecium</i><br>DO]                                                                           |
|       | gi:257878586 | ZP_05658239.1  | 80411 | 74    | sulfatase [ <i>Enterococcus faecium</i><br>1,230,933]                                                                    |
|       | gi:430835628 | ZP_19453617.1  | 80415 | 74    | sulfatase [ <i>Enterococcus faecium</i><br>E0680]                                                                        |
|       | gi:415894466 | ZP_11550330.1  | 71547 | 57    | sulfatase domain protein<br>[ <i>Enterococcus faecium</i> E4453]                                                         |
|       | gi:227551868 | ZP_03981917.1  | 80308 | 56    | phosphatidylglycerol--membrane-<br>oligosaccharide<br>glycerophosphotransferase<br>[ <i>Enterococcus faecium</i> TX1330] |
|       | gi:257884281 | ZP_05663934.1  | 80330 | 56    | sulfatase [ <i>Enterococcus faecium</i><br>1,231,501]                                                                    |
| 25kDa | gi:69244843  | ZP_00603067.1  | 21591 | 96    | Peptidoglycan-binding LysM<br>[ <i>Enterococcus faecium</i> DO]                                                          |
|       | gi:261208113 | ZP_05922788.1  | 21633 | 96    | peptidoglycan-binding LysM<br>[ <i>Enterococcus faecium</i> TC 6]                                                        |
|       | gi:314941298 | ZP_07848192.1  | 21621 | 96    | LysM domain protein [ <i>Enterococcus</i><br><i>faecium</i> TX0133C]                                                     |
|       | gi:424856196 | ZP_18280450.1  | 21619 | 96    | LysM domain protein [ <i>Enterococcus</i><br><i>faecium</i> R499]                                                        |
|       | gi:430827476 | ZP_19445618.1  | 21647 | 96    | LysM protein [ <i>Enterococcus faecium</i><br>E0164]                                                                     |
|       | gi:431303160 | ZP_19508007.1  | 21018 | 69    | LysM protein [ <i>Enterococcus faecium</i><br>E1626]                                                                     |
